# Supplementary material for: Imidazole and Imidazolium Antibacterial Drugs Derived from Amino Acids
Source: PubMed Central journal article supplement (PMC7767166; doi:10.3390/ph13120482), 2020-12-21
Supplement: pharmaceuticals-13-00482-s001.pdf [file pharmaceuticals-13-00482-s001.pdf]

# Imidazole and Imidazolium Bioactive Drugs Derived from Amino Acids

A. Valls,<sup>1</sup> J. Juan Andreu,<sup>1</sup> E. Falomir,<sup>1</sup> S.V. Luis,<sup>1</sup> E. Atrián-Blasco,<sup>\*2,3</sup> S. G. Mitchell<sup>2,3\*</sup> and B. Altava<sup>1\*</sup>

<sup>1</sup> Departamento de Química Inorgánica y Orgánica, Universitat Jaume I, Av. Sos Baynat s/n, 12071, Castellón, Spain.

<sup>2</sup> Instituto de Nanociencia y Materiales de Aragón (INMA), Consejo Superior de Investigaciones Científicas-Universidad de Zaragoza, 50009 Zaragoza, Spain.

<sup>3</sup> CIBER de Bioingeniería, Biomateriales y Nanomedicina, Instituto de Salud Carlos III, 28029 Madrid, Spain.

\* Correspondence: altava@uji.es and scott.mitchell@csic.es

**Fig. S1-S2** SEM images of bacteria after incubation with **1c** and **3b**

**Table S1.** MIC, MBC and IC<sub>50</sub> (μM) values

**Fig. S3.** Correlation between LogP and the retention time for the different compounds

**Fig. S4-S8.** HPLC chromatograms for compounds **1a-c**, **2a-c**, **3a-c**

**Fig. S9-S14.** Fluorescence studies of the aggregation of the compounds in different media

**Fig. S15.** Optical microscopy images for **1a**, **1b** and **1c** at 25 °C

**Fig S16.** Optical microscopy images for **2a**, **2b** and **2c** at 25 °C

**Fig S17.** Optical microscopy images for a **3a** and **3b** at 25 °C.

**Fig S18.** SEM images for **1c** in water, in 1/1 water/ bacterial culture and in bacterial culture media.

**Fig. S19.** Absorbance variation at 600 nm against time for **1a** in water, 1/1 bacterial cell culture/water and bacterial cell culture media.

**Fig. S20.** Absorbance variation at 600 nm against time for **1c** in water, 1/1 bacterial cell culture/water and bacterial cell culture media.

**Fig. S21.** <sup>1</sup>H NMR (400 MHz) of **3a** in CDCl<sub>3</sub> and CD<sub>3</sub>OD.

**Fig. S22.** <sup>13</sup>C NMR (101 MHz) of **3a** in CDCl<sub>3</sub>.

**Fig. S23.** MS (ESI) of **3a**.

**Fig. S24.** <sup>1</sup>H NMR spectrum of **3b** in CDCl<sub>3</sub> (300 MHz).

**Fig. S25.** <sup>13</sup>C NMR spectrum of **3b** in CDCl<sub>3</sub> (101 MHz)

**Fig. S26.** MS (ESI) of **3b**.

**Fig. S27.** <sup>1</sup>H NMR spectrum of **3c** in CDCl<sub>3</sub> (300 MHz).

**Fig. S28.** <sup>13</sup>C NMR spectrum of **3c** in CDCl<sub>3</sub> (101 MHz).

**Fig. S29.** MS (ESI) of **3c**.

**Fig. S30.**  $^1\text{H}$  NMR of **2b** in  $\text{CDCl}_3$ . (400 MHz).

**Fig. S31.**  $^{13}\text{C}$  NMR of **2b** in  $\text{CDCl}_3$ . (101 MHz).

**Fig. S32.** MS (ESI) of **2b**.

**Fig. S33.**  $^1\text{H}$  NMR spectrum of **2c** in  $\text{CDCl}_3$  (500 MHz).

**Fig. S34.**  $^{13}\text{C}$  NMR spectrum of **2c** in  $\text{CDCl}_3$  (126 MHz).

**Fig. S35.** MS (ESI) of **2c**.

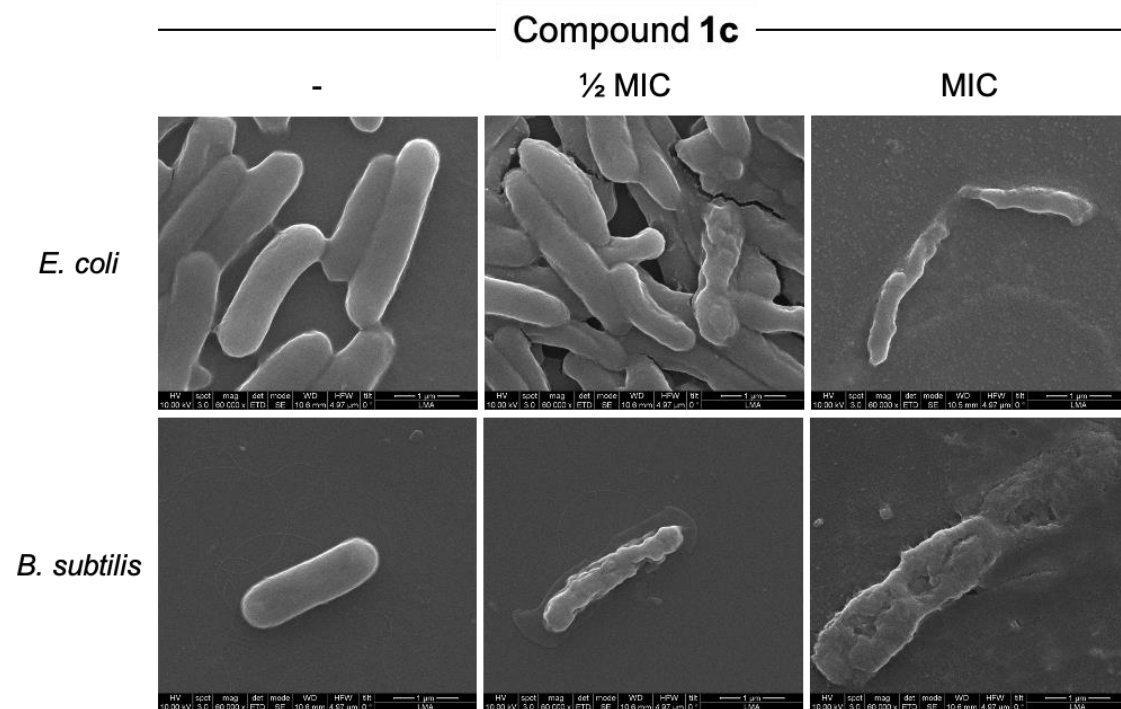

**Fig. S1.** Scanning Electron Microscopy (SEM) images of *E. coli* and *B. subtilis* bacteria without treatment (-) and after incubation with compound 1c at its ½ MIC and MIC (60000 x).

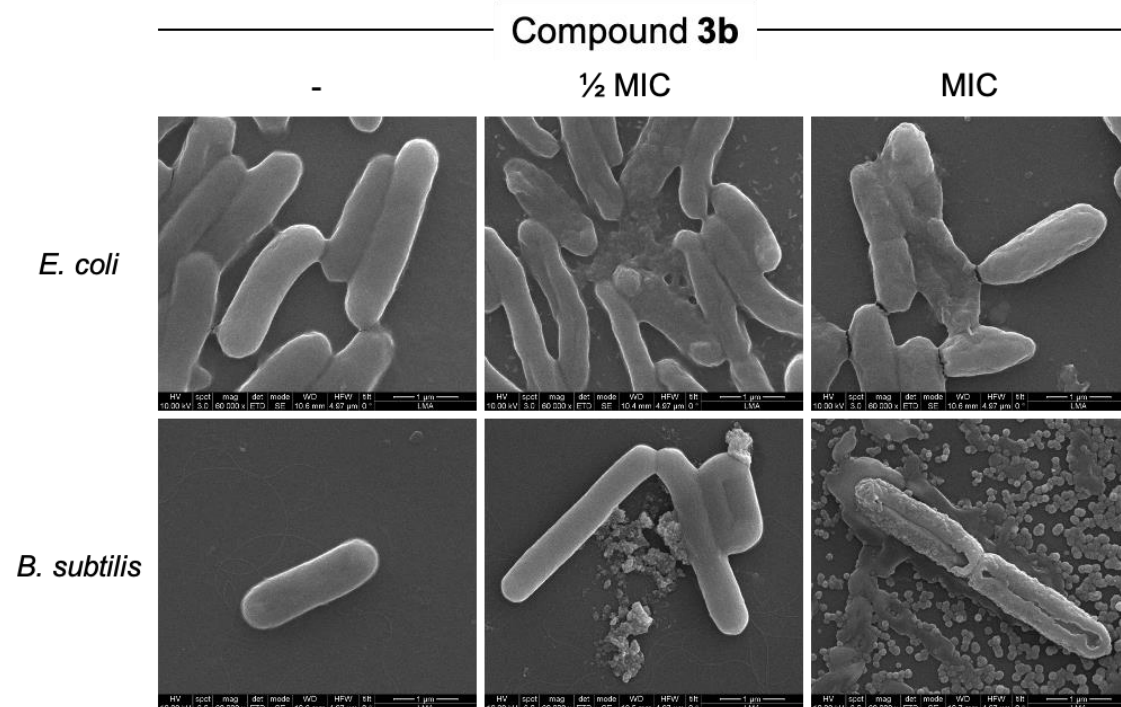

**Fig S2.** Scanning Electron Microscopy (SEM) images of *E. coli* and *B. subtilis* bacteria without treatment (-) and after incubation with compound 3b at its ½ MIC and MIC (60000 x).

**Table S1.** Minimum Inhibitory Concentration (MIC,  $\mu\text{M}$ ), Minimal Bactericidal Concentration (MBC,  $\mu\text{M}$ ), the half maximal inhibitory concentration  $\text{IC}_{50}$  ( $\mu\text{M}$ ) values

| Entry | Compound | <i>E. coli</i>                    |                                   | <i>B. subtilis</i>                |                                   | HEK-293                           |
|-------|----------|-----------------------------------|-----------------------------------|-----------------------------------|-----------------------------------|-----------------------------------|
|       |          | MIC <sup>a</sup><br>$\mu\text{M}$ | MBC <sup>a</sup><br>$\mu\text{M}$ | MIC <sup>a</sup><br>$\mu\text{M}$ | MBC <sup>a</sup><br>$\mu\text{M}$ | $\text{IC}_{50}$<br>$\mu\text{M}$ |
| 1     | 1a       | >6000                             | >6000                             | 48                                | 48                                | 9.6 $\pm$ 1.6                     |
| 2     | 1b       | 288                               | 581                               | 9                                 | 18                                | 1.8 $\pm$ 0.4                     |
| 3     | 1c       | 269                               | 269                               | 19                                | 34                                | 19 $\pm$ 4                        |
| 4     | 2a       | >9000                             | >9000                             | >9000                             | >9000                             | >200                              |
| 5     | 2b       | >5000                             | >5000                             | 2591                              | 2591                              | >200                              |
| 6     | 2c       | 1444                              | >2900                             | 180                               | 361                               | >200                              |
| 7     | 3a       | 2662                              | >5000                             | 42                                | 42                                | 19 $\pm$ 3                        |
| 8     | 3b       | 57                                | 229                               | 7                                 | 7                                 | 109 $\pm$ 10                      |
| 9     | 3c       | 1986                              | 1986                              | 62                                | 62                                | 36 $\pm$ 5                        |

<sup>a</sup> Mode – most frequent value - of MIC and MBC values from at least three experiments (when obtaining the same values) or at least five experiments (when the values obtained are different).

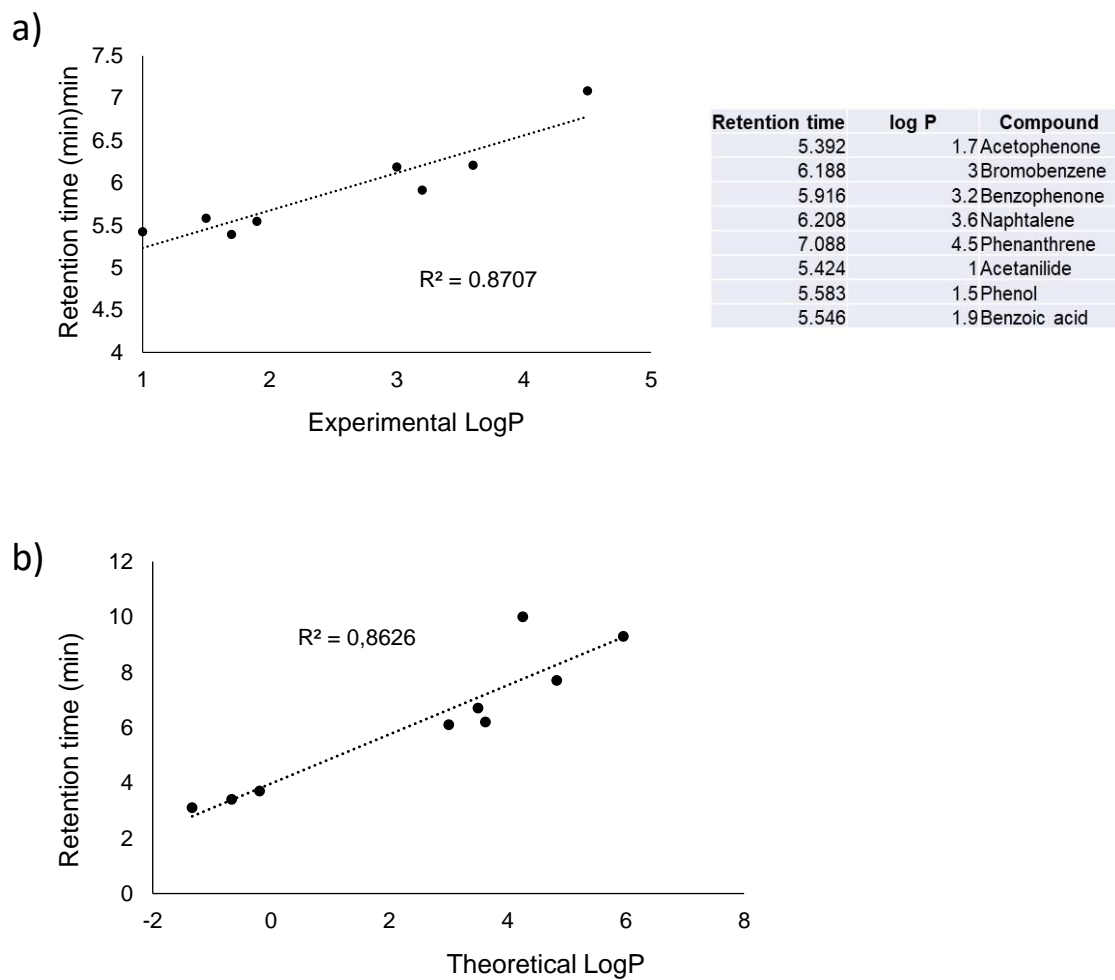

**Fig. S3.** a) Correlation between experimental LogP values and experimental retention time for different commercial compounds b) Correlation between LogP and the retention time for the different compounds **1a-c**, **2a-c**, **3a-c**.

### CH<sub>3</sub>OH

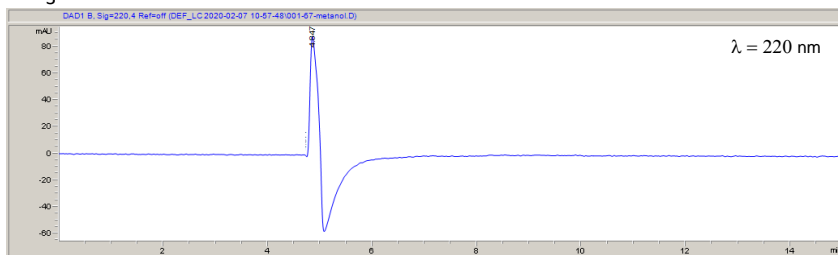

### Acetanilide

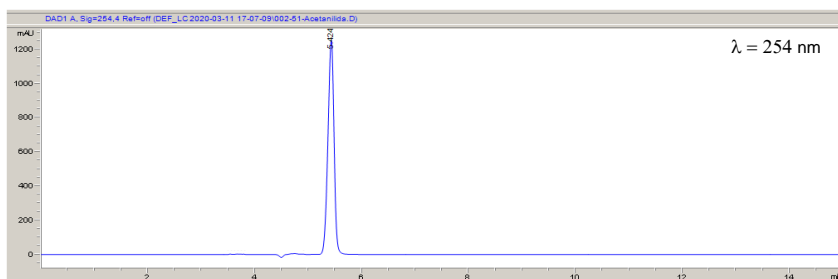

### Naphtalene

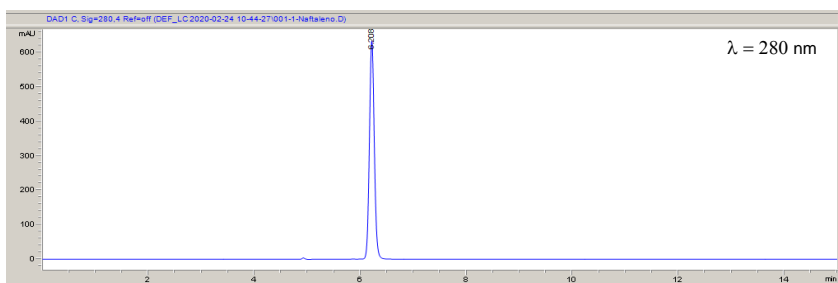

### Phenol

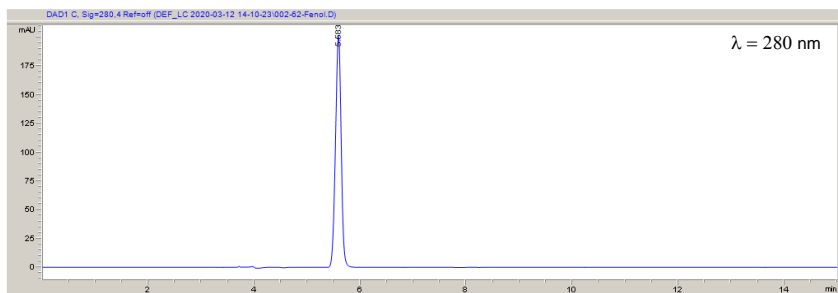

### Benzoic acid

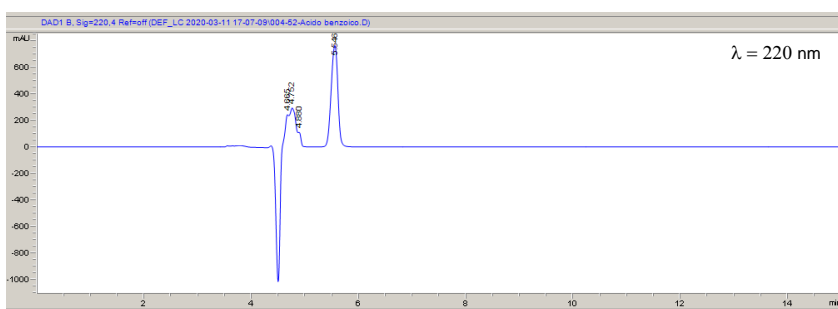

**Fig. S4.** HPLC chromatograms for methanol, acetanilide, naphthalene, phenol and benzoic acid. Mobile phase water/CH<sub>3</sub>CN 30/70 (0.1% HCO<sub>2</sub>H), 25°C and flow 0.2 mL/min.

## Benzophenone

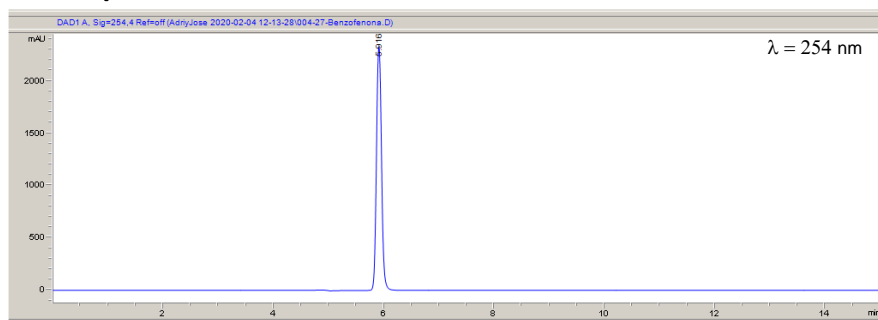

## Phenantrene

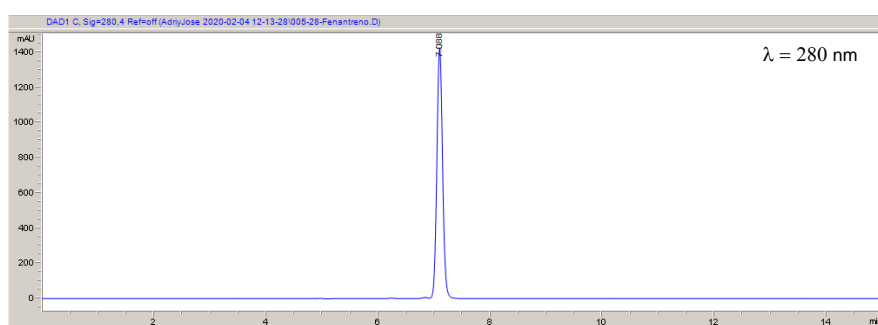

## Acetophenone

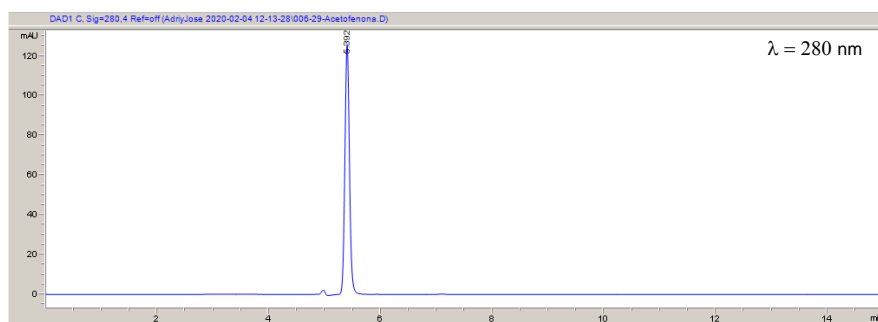

## Bromobenzene

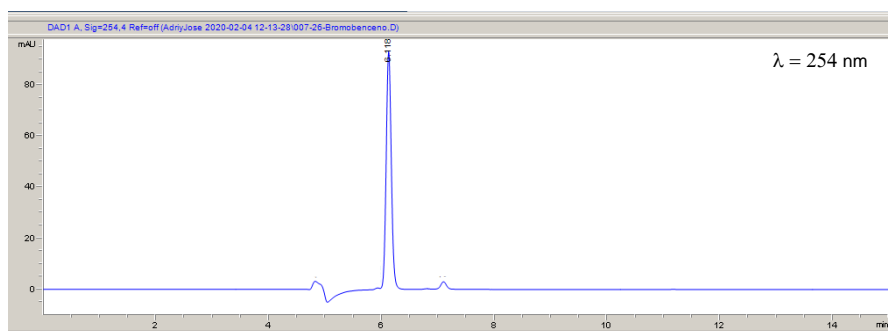

**Fig. S5.** HPLC chromatograms for benzophenone, phenantrene, acetophenone and bromobenzene. Mobile phase water/CH<sub>3</sub>CN 30/70 (0.1% HCO<sub>2</sub>H), 25 °C and flow 0.2 mL/min.

**1a**

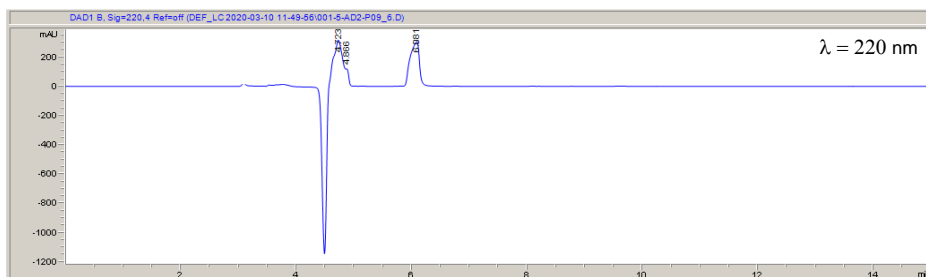

**1b**

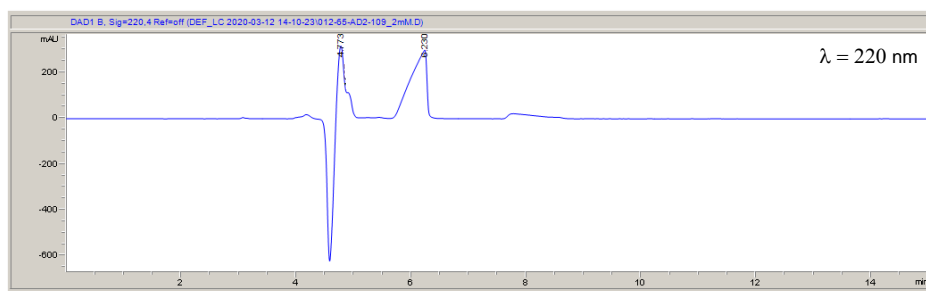

**1c**

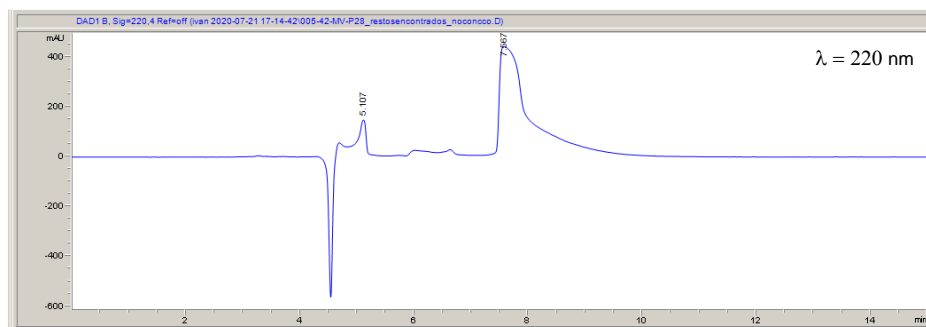

**Fig. S6.** HPLC chromatograms for compounds **1a-c**. Mobile phase water/CH<sub>3</sub>CN 30/70 (0.1% HCO<sub>2</sub>H), 25 °C and flow 0.2 mL/min.



2a

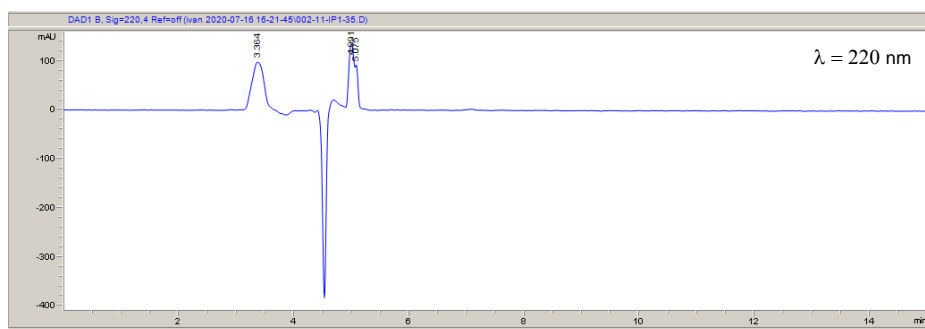

2b

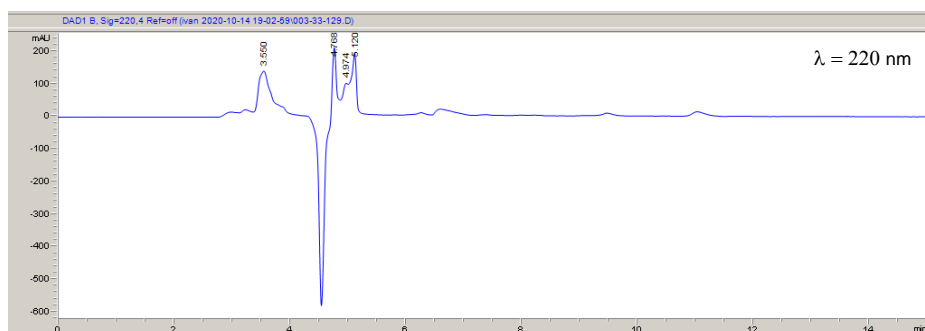

2c

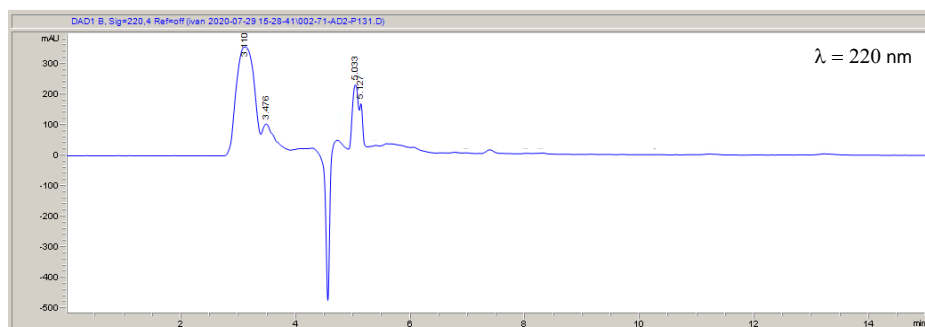

**Fig. S7.** HPLC chromatograms for compounds **2a-c**. Mobile phase water/CH<sub>3</sub>CN 30/70 (0.1% HCO<sub>2</sub>H), 25 °C and flow 0.2 mL/min.

**3a**

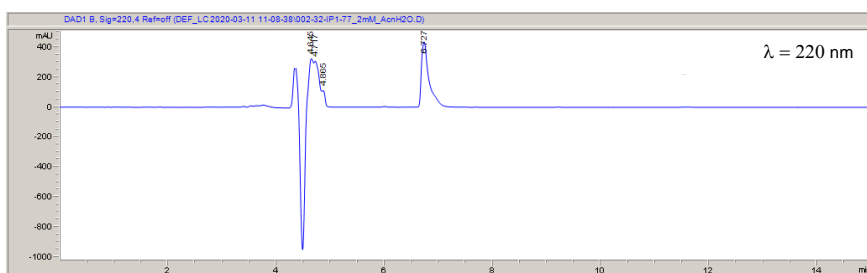

**3b**

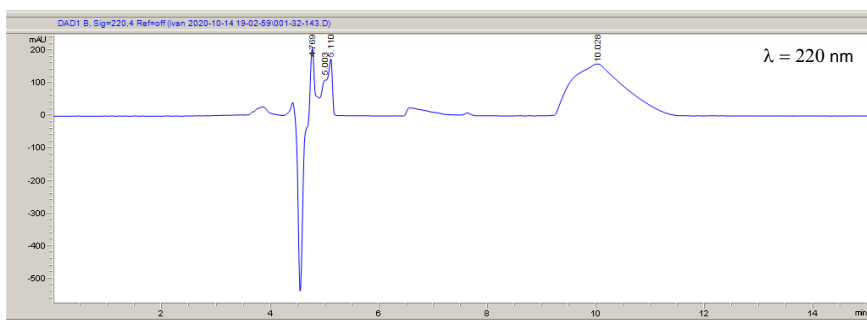

**3c**

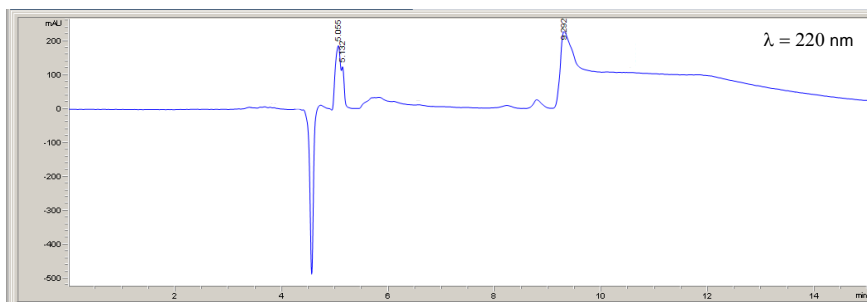

**Fig. S8.** HPLC chromatograms for compounds **3a-c**. Mobile phase water/CH<sub>3</sub>CN 30/70 (0.1% HCO<sub>2</sub>H), 25 °C and flow 0.2 mL/min.

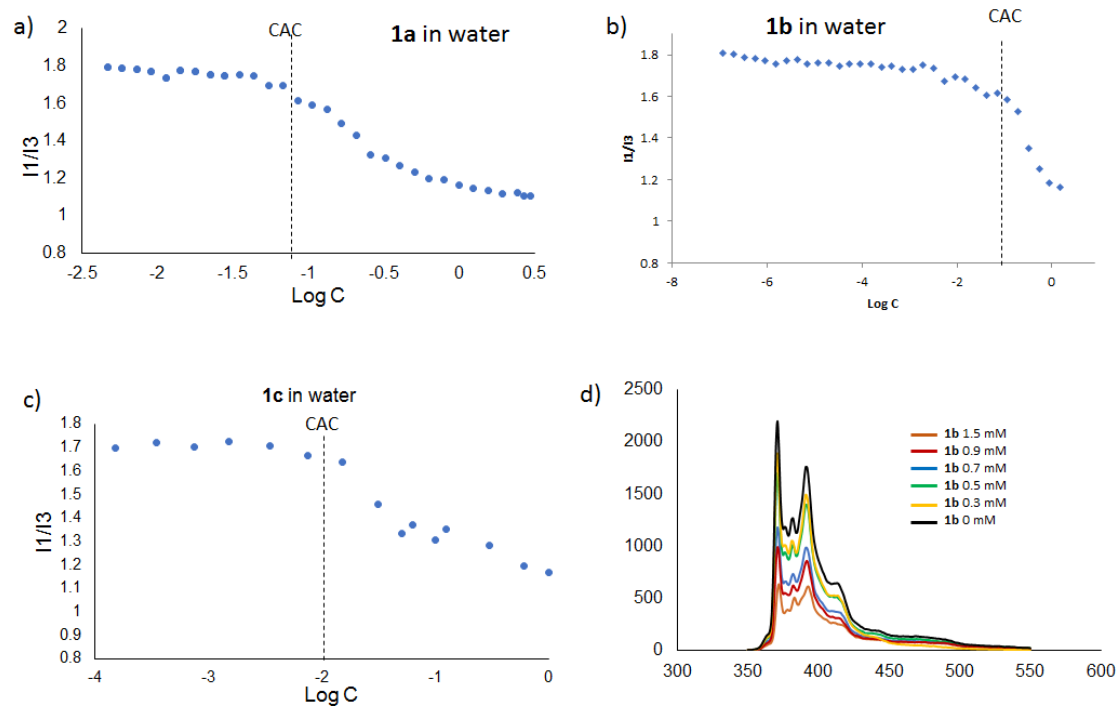

**Fig. S9.** a) - c) Plots of the  $I_1/I_3$  ratios  $v$   $\log C$  for **1a-1c** in H<sub>2</sub>O at 25 °C. d) Emission spectra of pyrene in H<sub>2</sub>O at 25 °C in the presence of different amounts of **1b**.

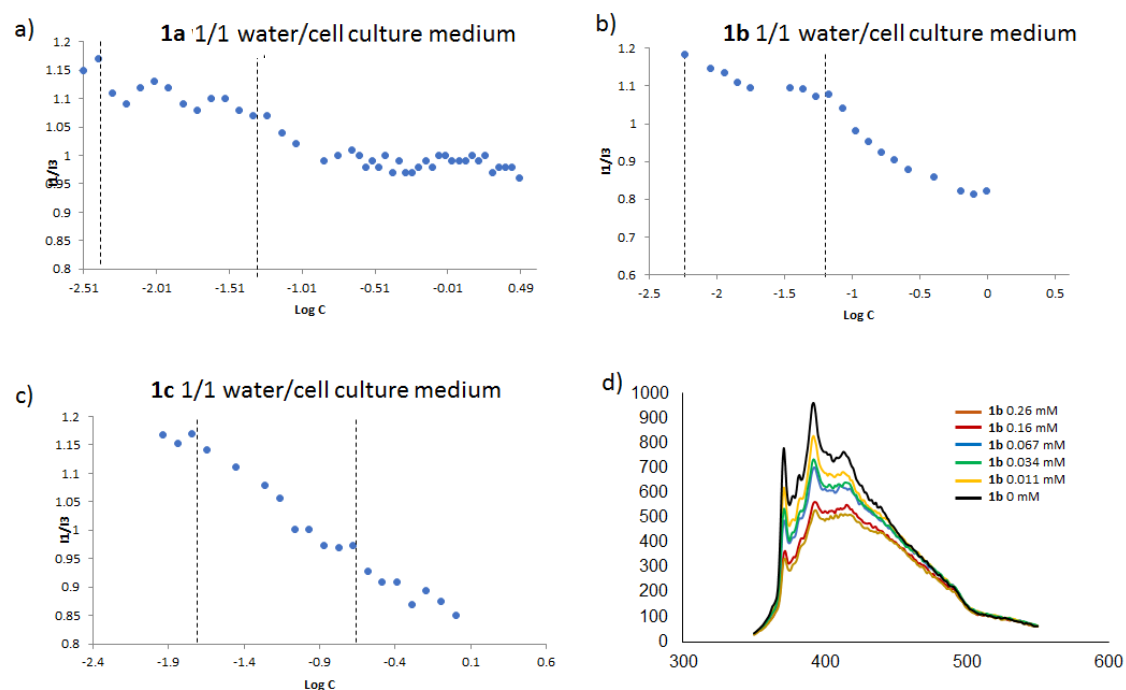

**Fig. S10.** a) - c) Plots of the  $I_1/I_3$  ratios  $v$   $\log C$  for **1a-1c** in 1/1 water/bacterial cell culture medium at 25 °C. d) Emission spectra of pyrene in 1/1 water/bacterial cell culture medium at 25 °C in the presence of different amounts of **1b**.

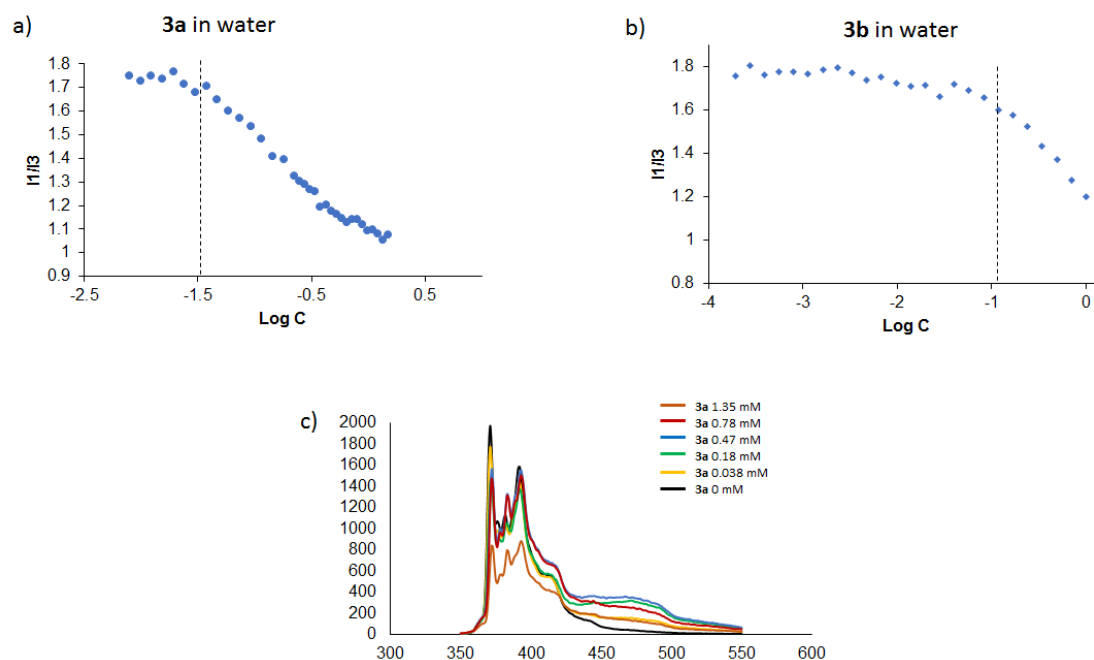

**Fig. S11.** a)-b) Plots of the  $I_1/I_3$  ratios  $v$   $\log C$  for **3a-3b** in H<sub>2</sub>O at 25 °C. d) Emission spectra of pyrene in H<sub>2</sub>O at 25 °C in the presence of different amounts of **3a**.

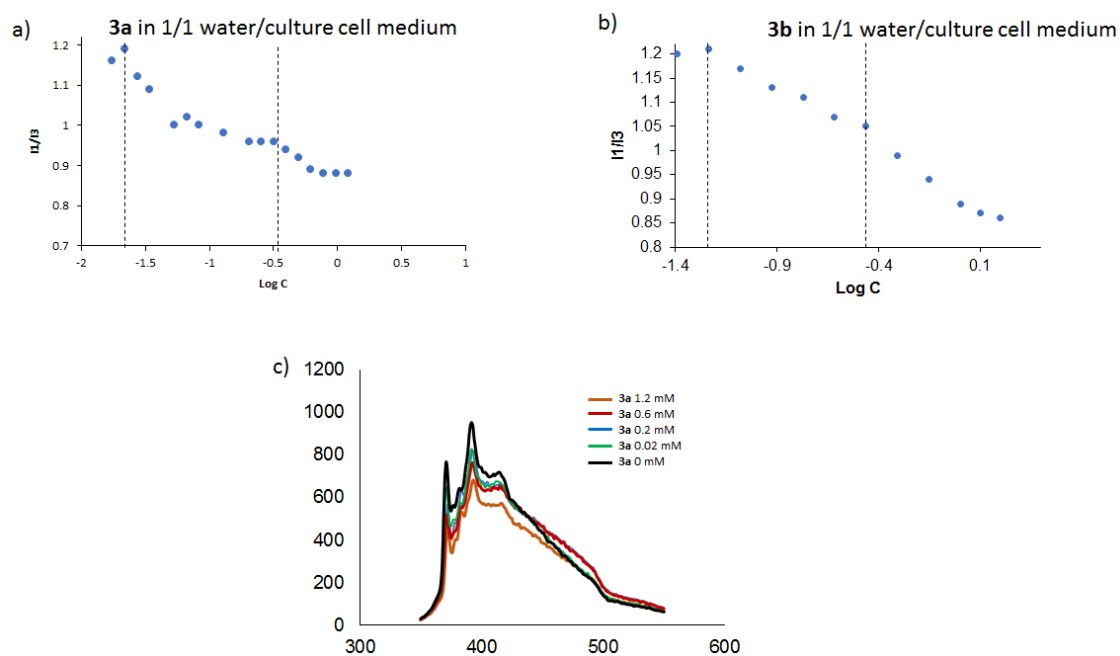

**Fig. S12.** a)-b) Plots of the  $I_1/I_3$  ratios  $v$   $\log C$  for **3a-3b** in 1/1 water/bacterial cell culture medium at 25 °C. d) Emission spectra of pyrene in 1/1 water/bacterial cell culture medium at 25 °C in the presence of different amounts of **3a**.

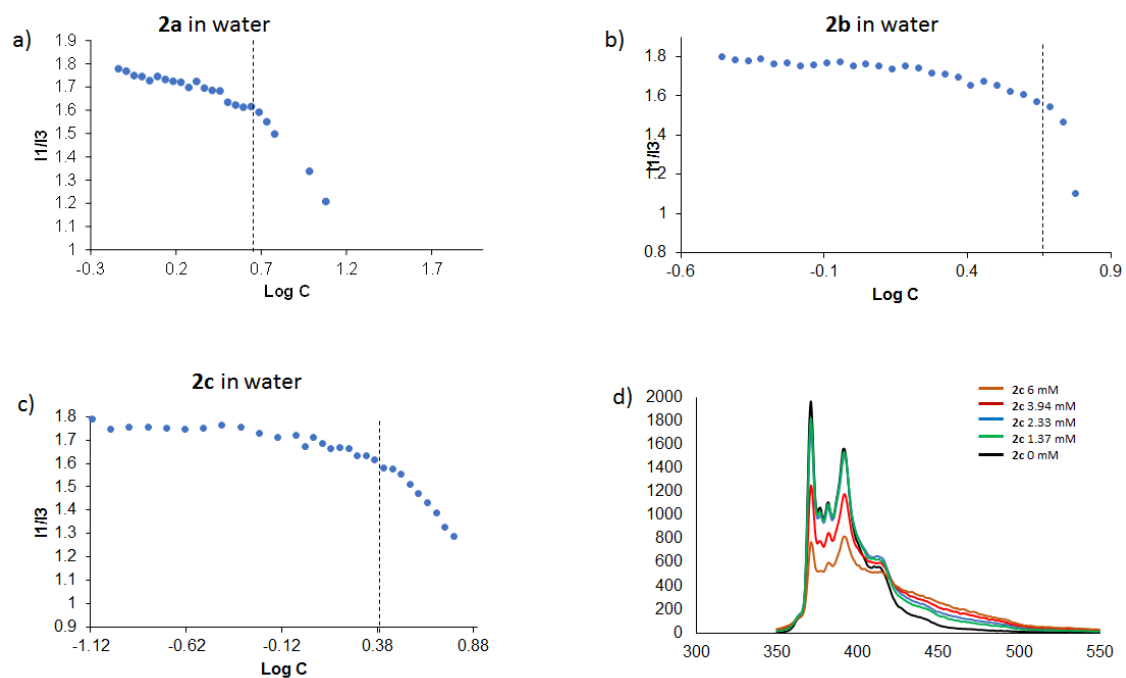

**Fig. S13.** a) - c) Plots of the  $I_1/I_3$  ratios  $v$   $\log C$  for **2a-2c** in H<sub>2</sub>O at 25 °C. d) Emission spectra of pyrene in H<sub>2</sub>O at 25 °C in the presence of different amounts of **2c**.

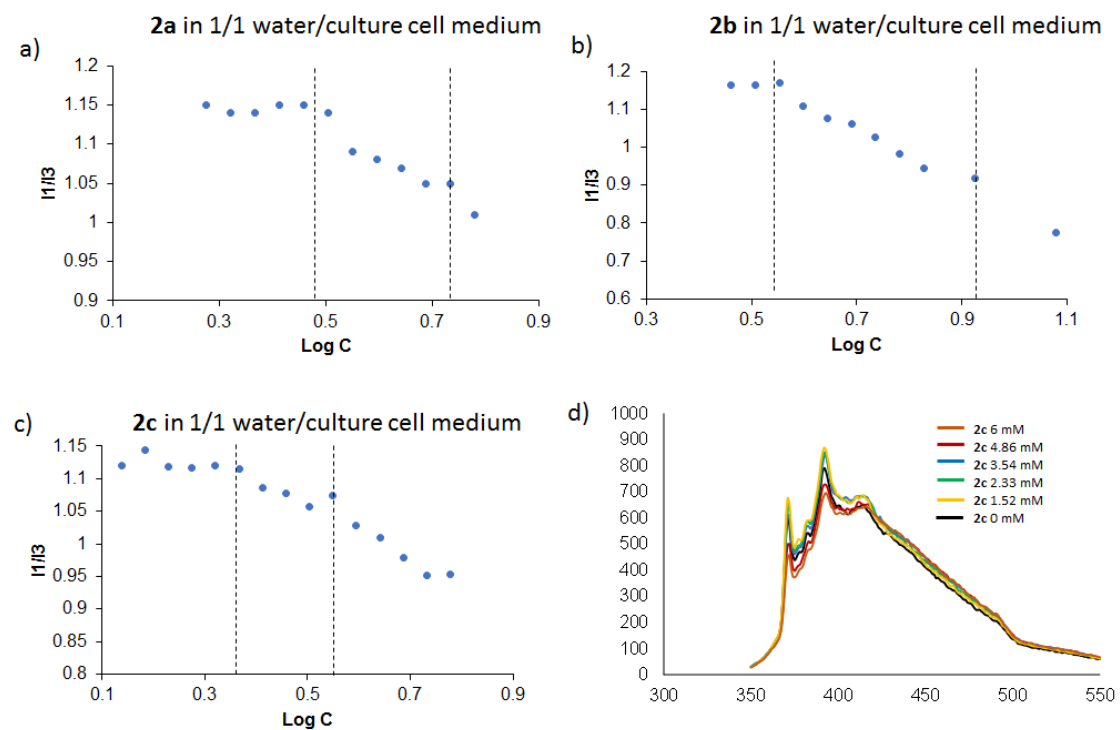

**Fig. S14.** a) - c) Plots of the  $I_1/I_3$  ratios  $v$   $\log C$  for **2a-2c** in 1/1 water/ bacterial cell culture medium at 25 °C. d) Emission spectra of pyrene in 1/1 water/ bacterial cell culture medium at 25 °C in the presence of different amounts of **2c**.

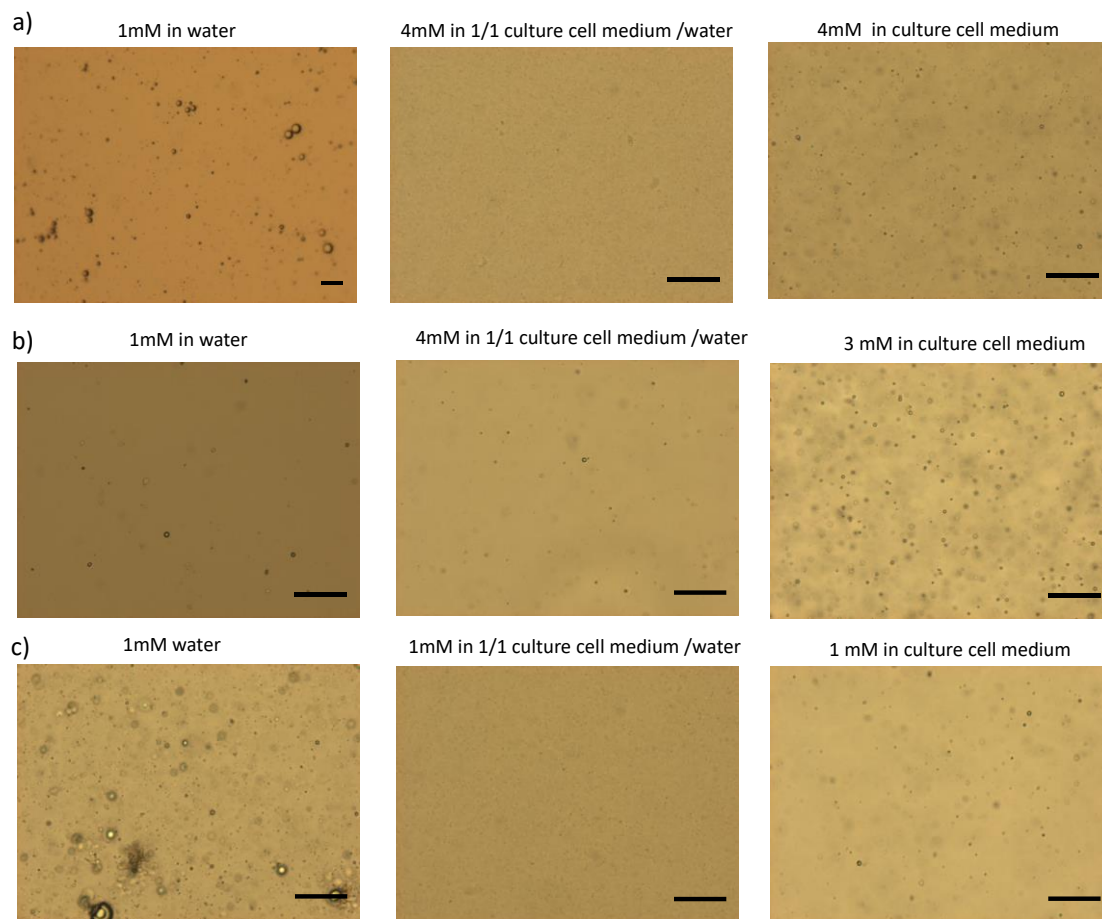

**Fig. S15.** Optical microscopy images for a) **1a** b) **1b** and c) **1c** at 25 °C in water, 1/1 water/bacterial cell culture medium and bacterial culture medium. Scale bar 50  $\mu\text{m}$ .

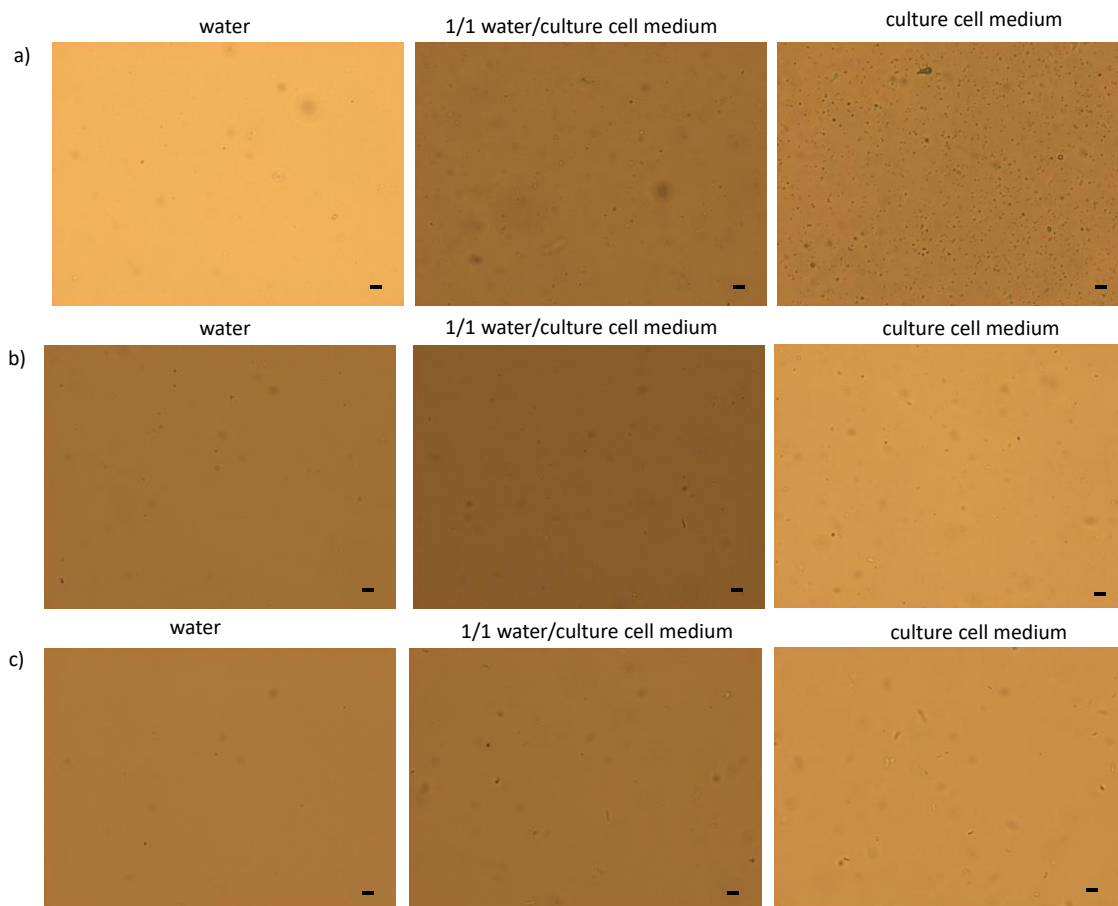

**Fig S16.** Optical microscopy images for a) **2a** b) **2b** and c) **2c** 4 mM at 25 °C, in water, 1/1 water/bacterial cell culture medium and bacterial cell culture medium. Scale bar 10  $\mu$ M.

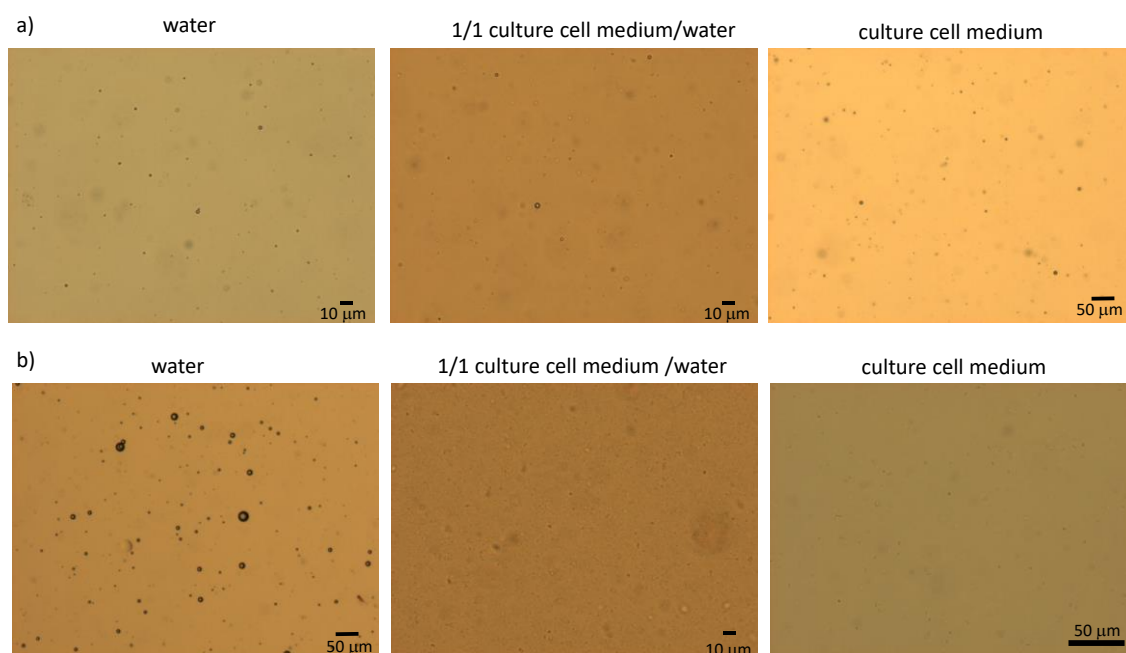

**Fig S17.** Optical microscopy images for a) **3a** 0.5 mM and b) **3b** 0.5 mM at 25 °C, in water, 1/1 water/bacterial cell culture medium and bacterial cell culture medium.

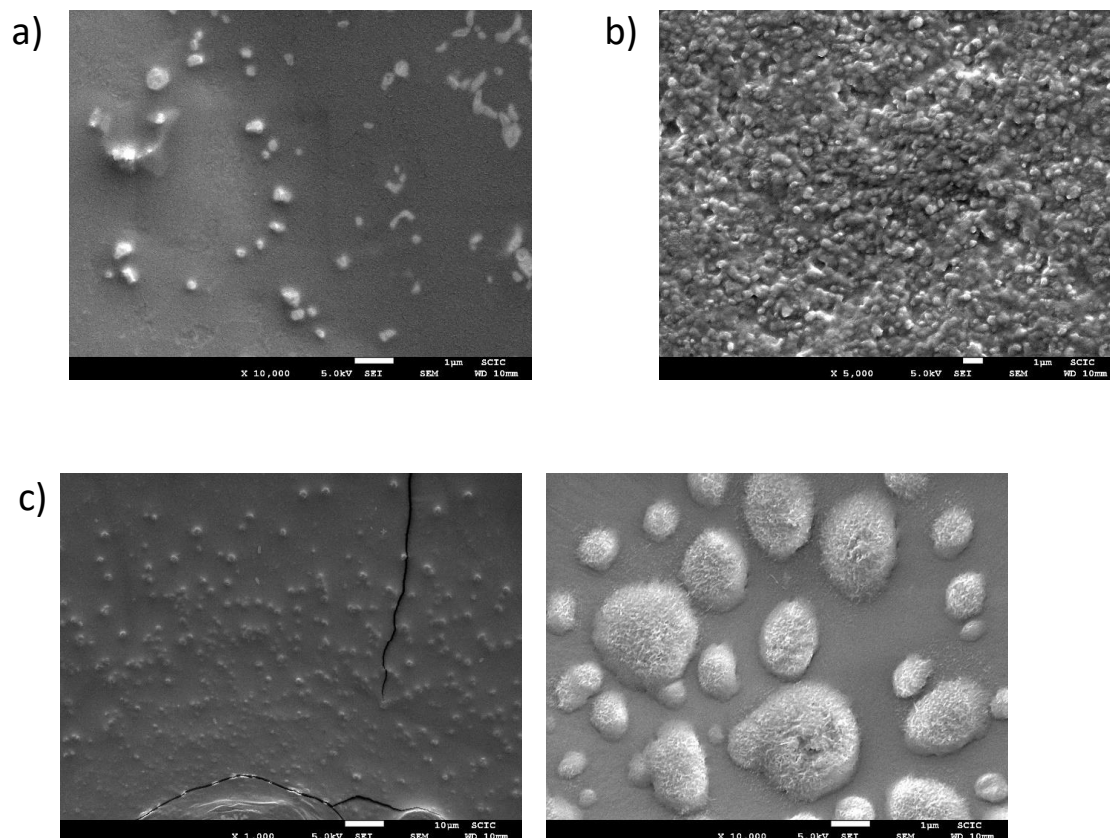

**Fig S18.** SEM images for **1c** a) 0.5 mM in water; b) 1 mM in 1/1 water/bacterial cell culture medium and c) 1 mM in bacterial cell culture medium.

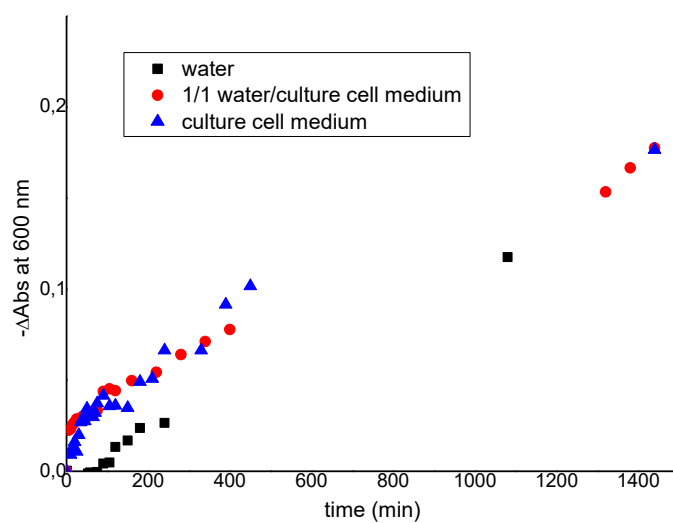

**Fig. S19.** Absorbance variation at 600 nm against time for **1a** (1 mM) in water, 1/1 water/bacterial cell culture medium, and bacterial cell culture medium.



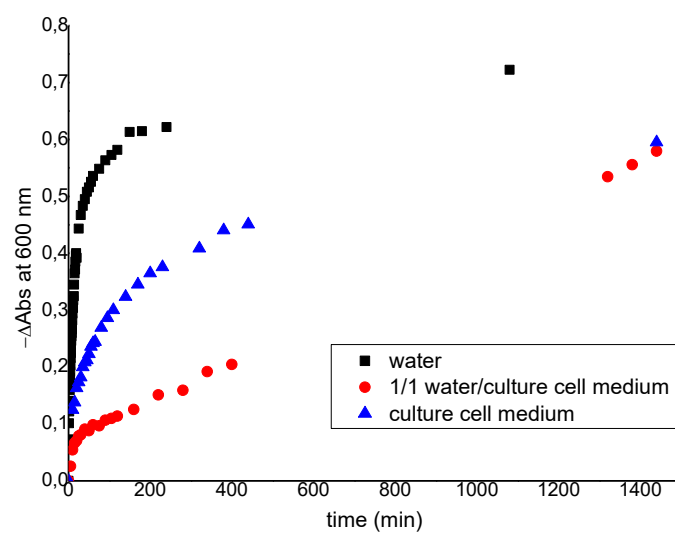

**Fig. S20.** Absorbance variation at 600 nm against time for **1c** (1mM) in water, 1/1 water/bacterial cell culture medium and bacterial cell culture medium.

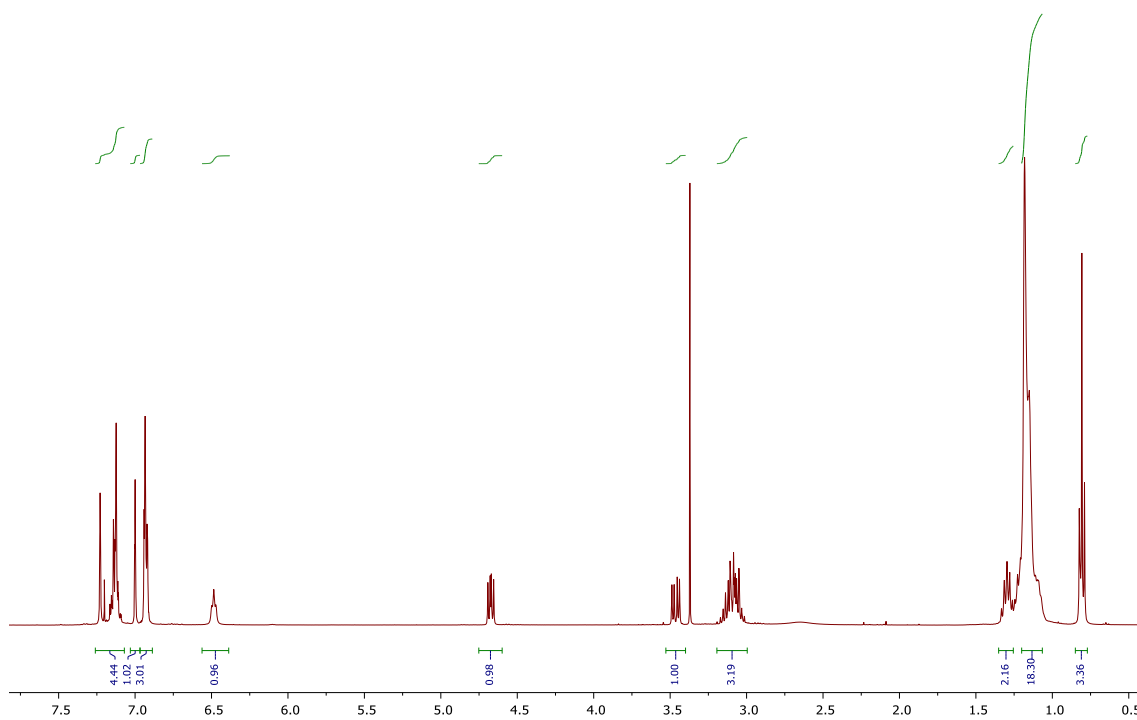

Fig. S21. <sup>1</sup>H NMR (400 MHz) of 3a in CDCl<sub>3</sub> and CD<sub>3</sub>OD.

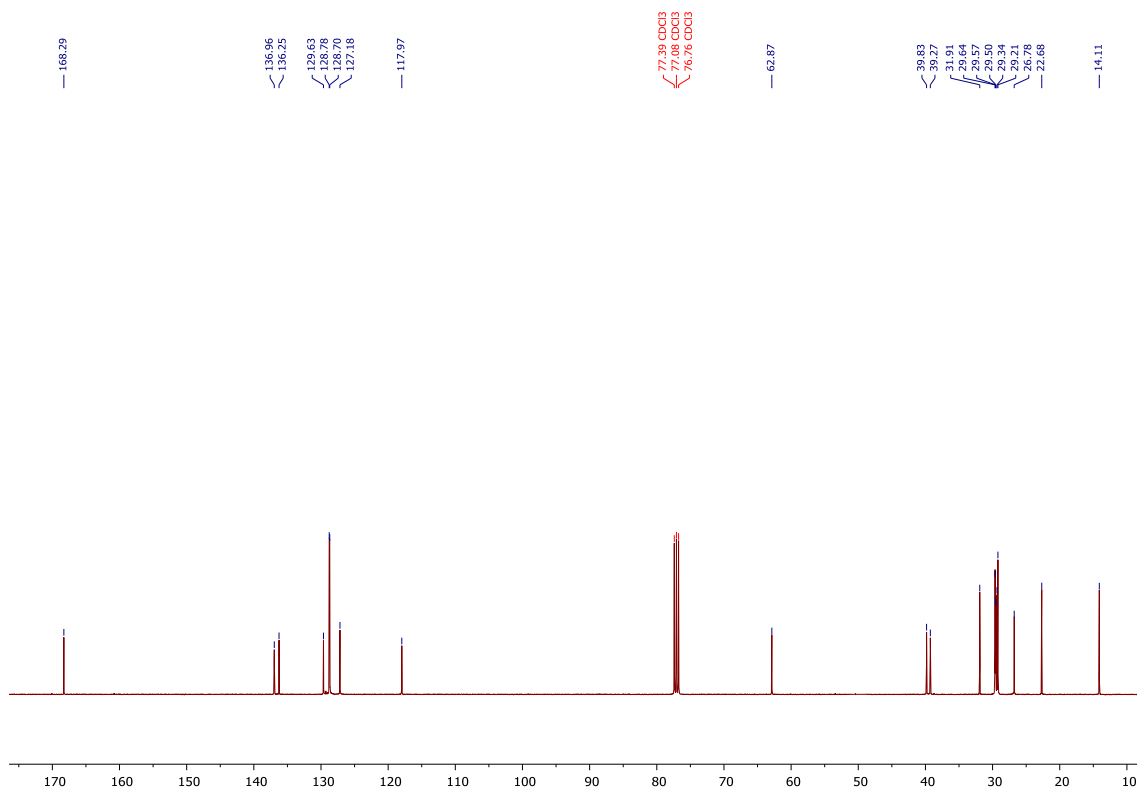

Fig. S22. <sup>13</sup>C NMR (101 MHz) of 3a in CDCl<sub>3</sub>.

IP1-77, scan pos, MeOH, 20V,

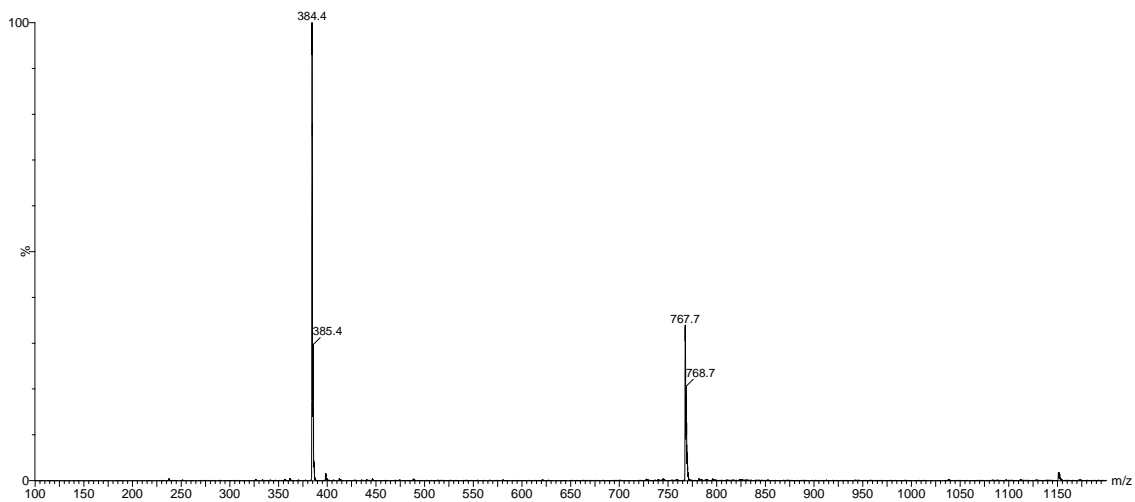

Fig. S23. MS (ESI) of 3a.

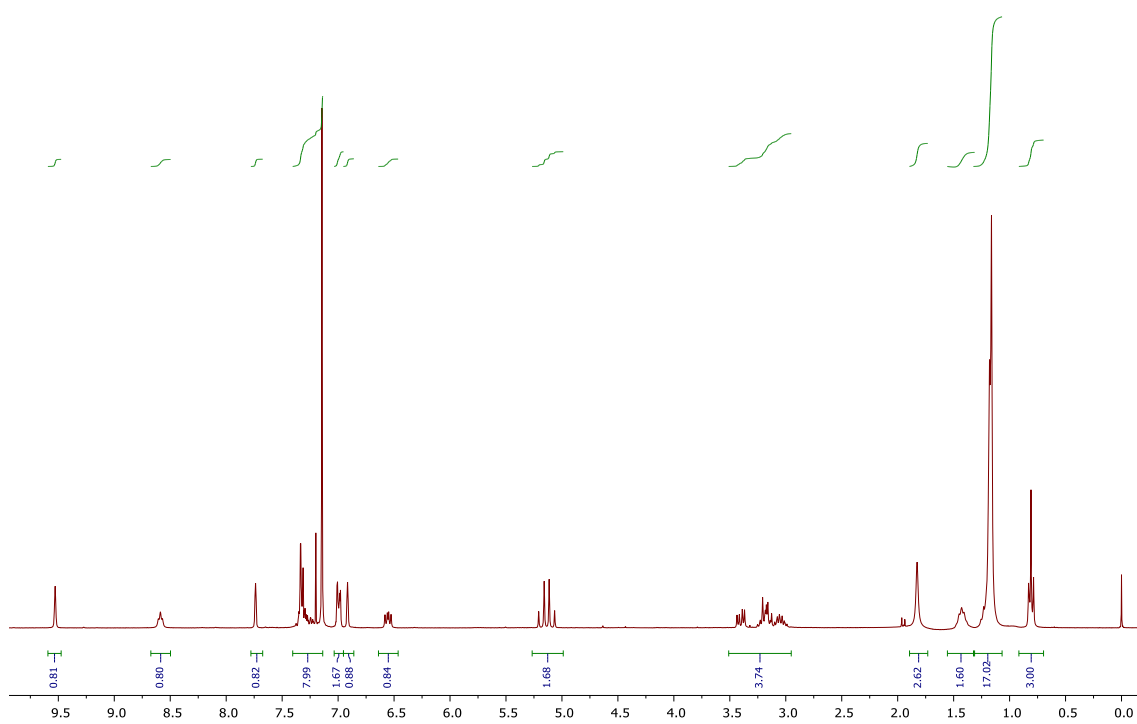

Fig. S24. <sup>1</sup>H NMR (300 MHz) of 3b in CDCl<sub>3</sub>.

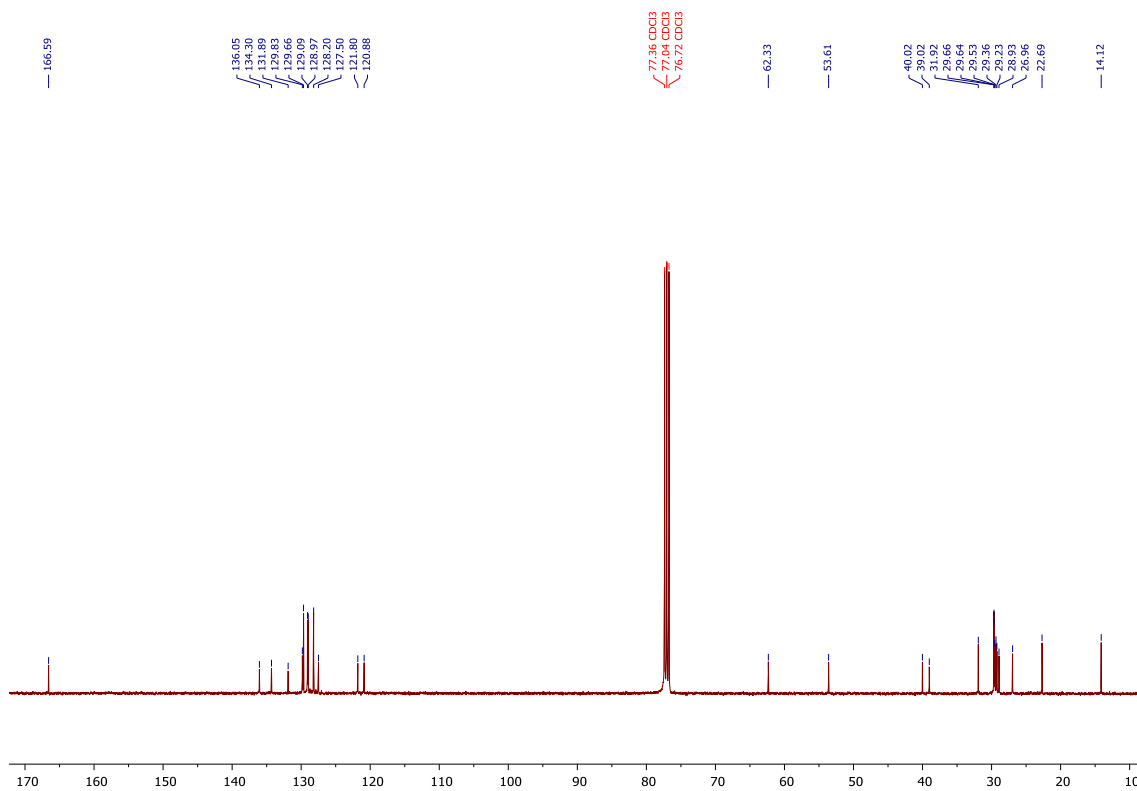

Fig. S25.  $^{13}\text{C}$  NMR (101 MHz) of **3b** in  $\text{CDCl}_3$ .

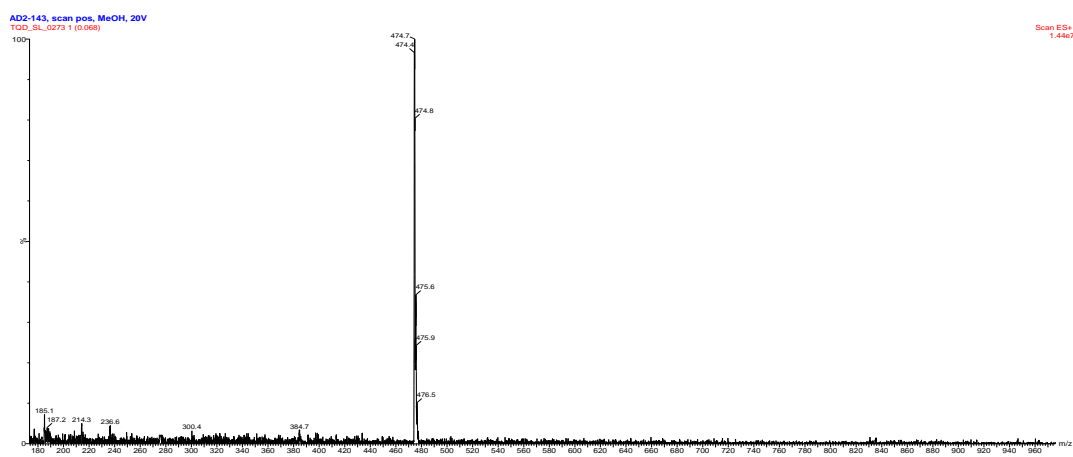

Fig. S26. MS (ESI) of **3b**.

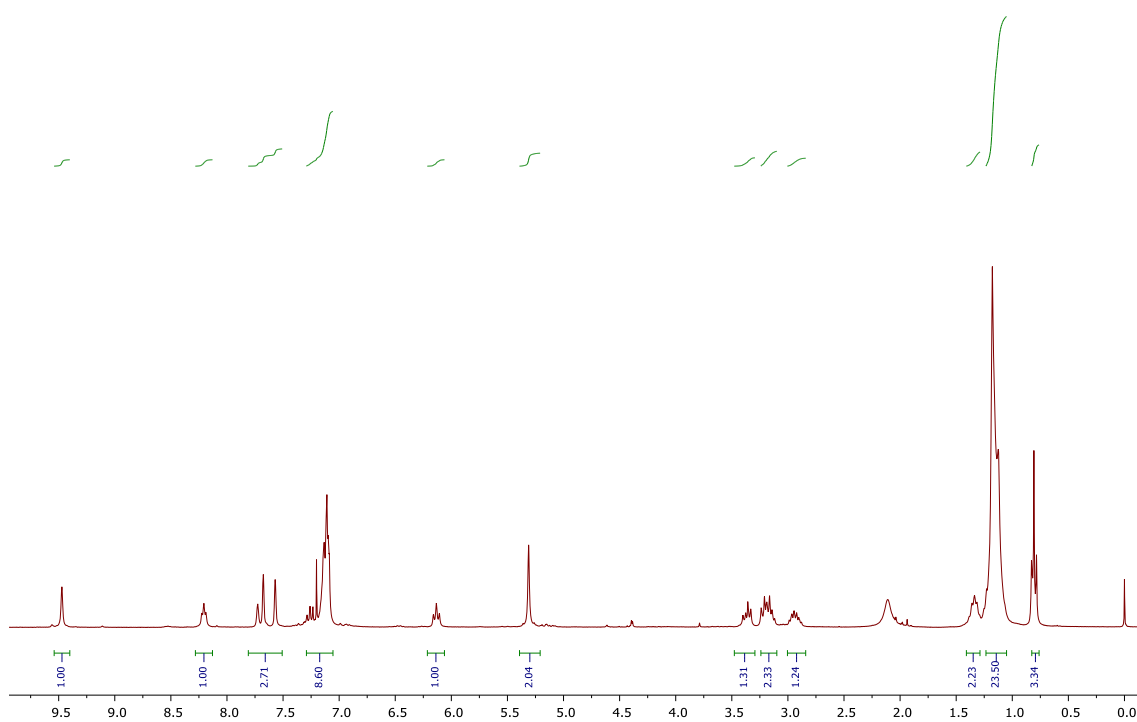

Fig. S27. <sup>1</sup>H NMR (300 MHz) of 3c in CDCl<sub>3</sub>.

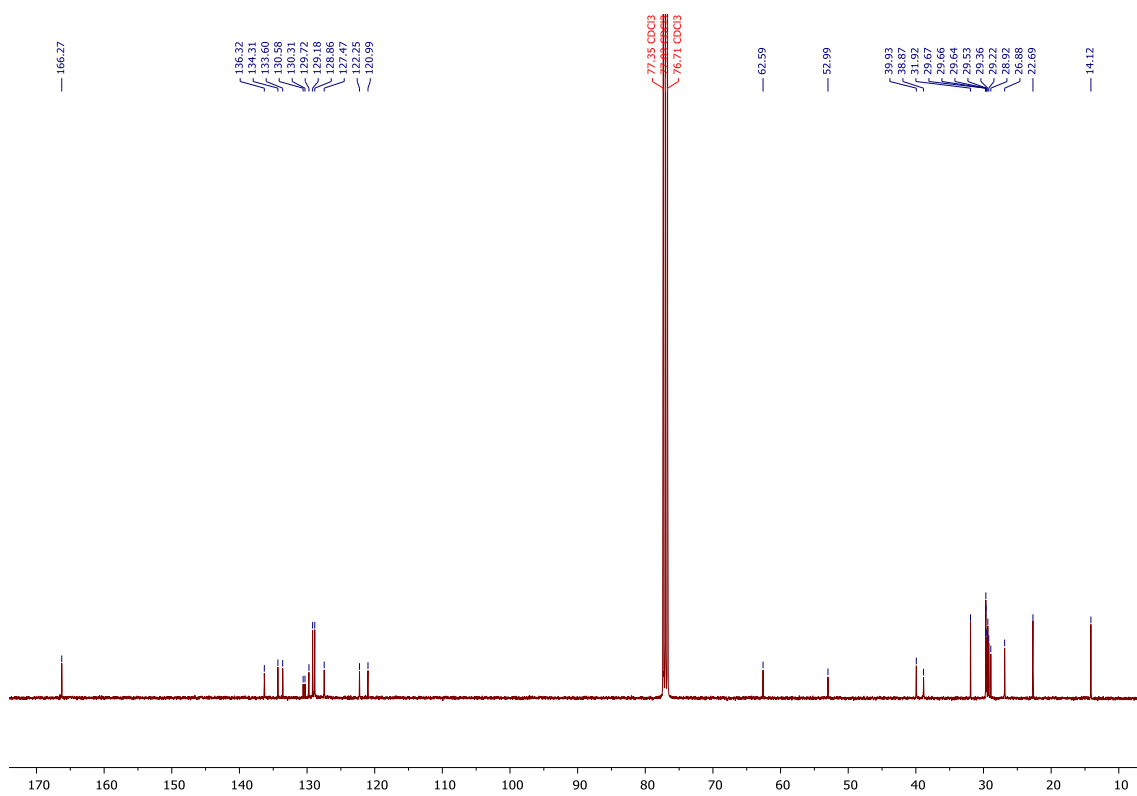

Fig. S28. <sup>13</sup>C NMR (101 MHz) of 3c in CDCl<sub>3</sub>.

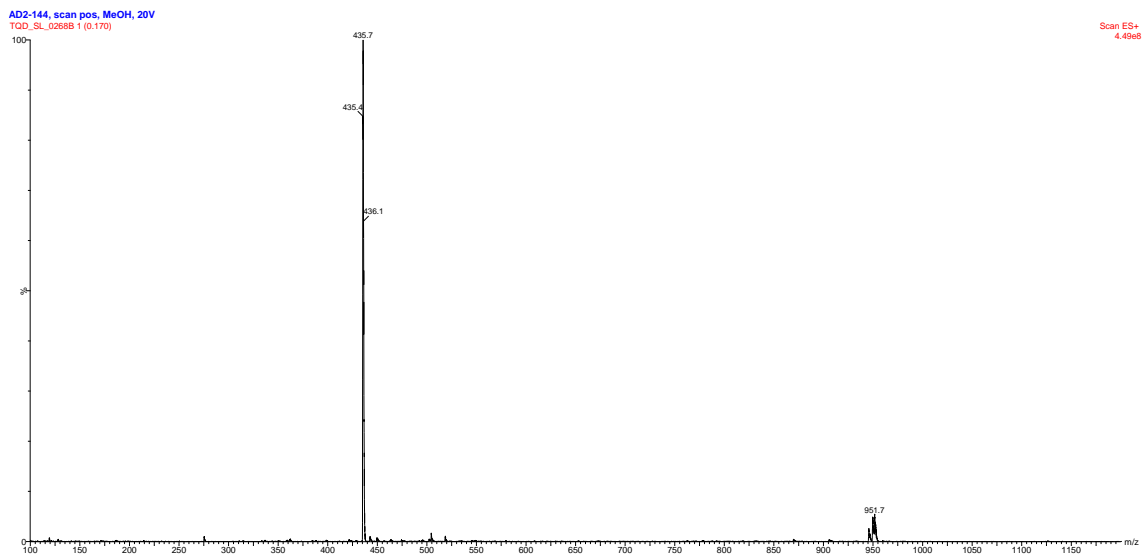

Fig. S29. MS (ESI) of **3c**.

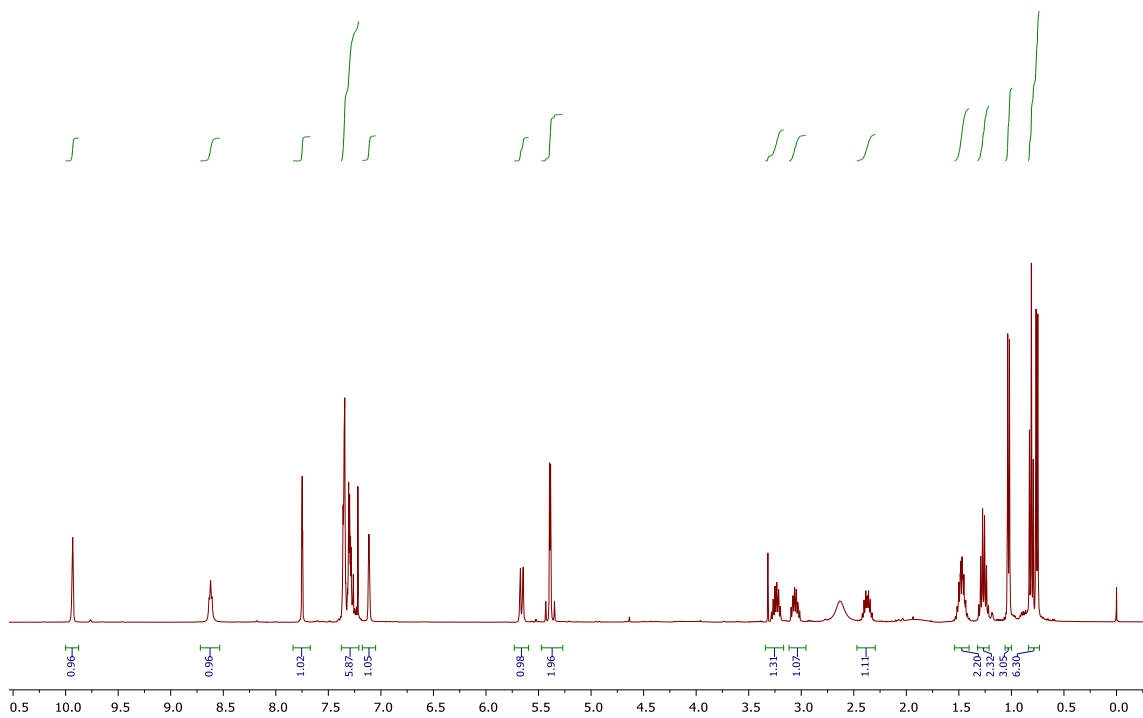

Fig. S30.  $^1\text{H}$  NMR (400 MHz) of **2b** in  $\text{CDCl}_3$ .

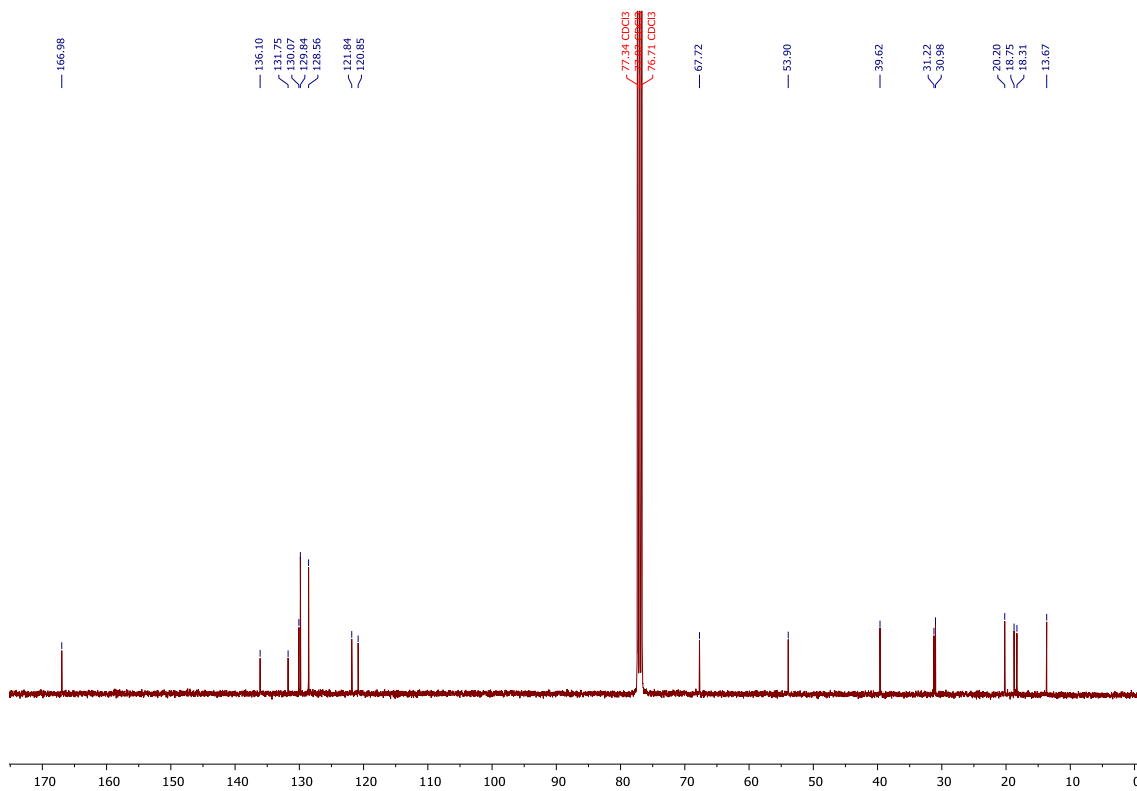

Fig. S31. <sup>13</sup>C NMR (101 MHz) of **2b** in CDCl<sub>3</sub>.

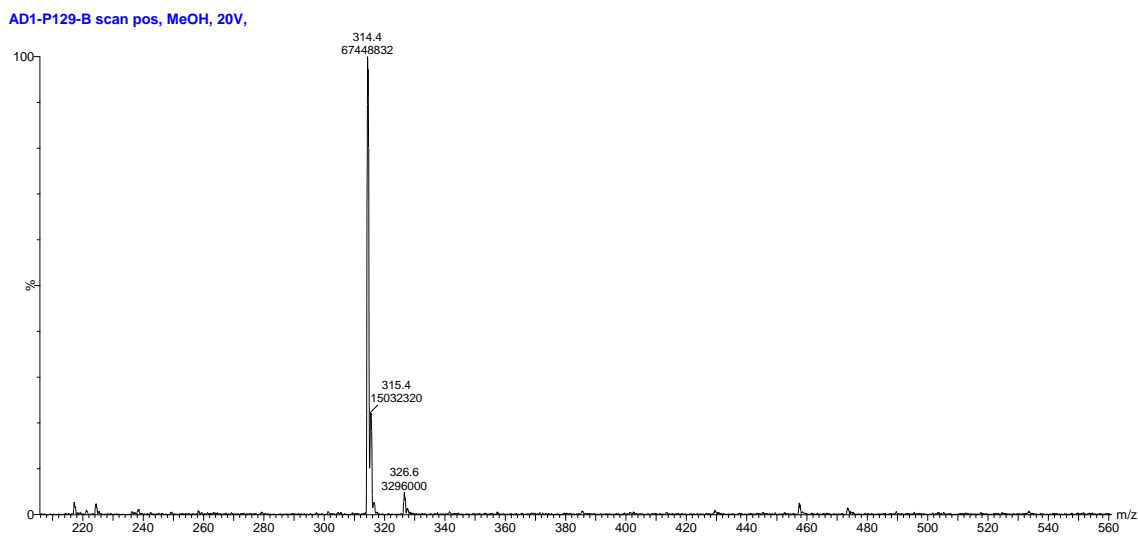

Fig. S32. MS (ESI) of **2b**.

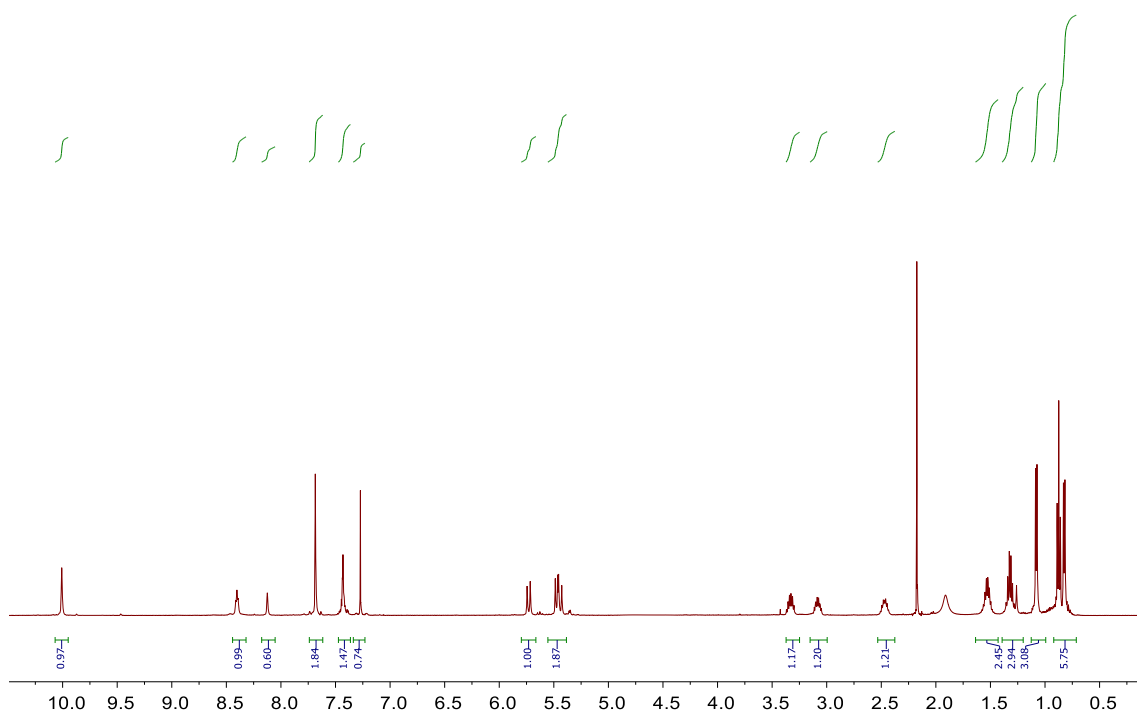

Fig. S33.  $^1\text{H}$  NMR (500 MHz) of **2c** in  $\text{CDCl}_3$ .

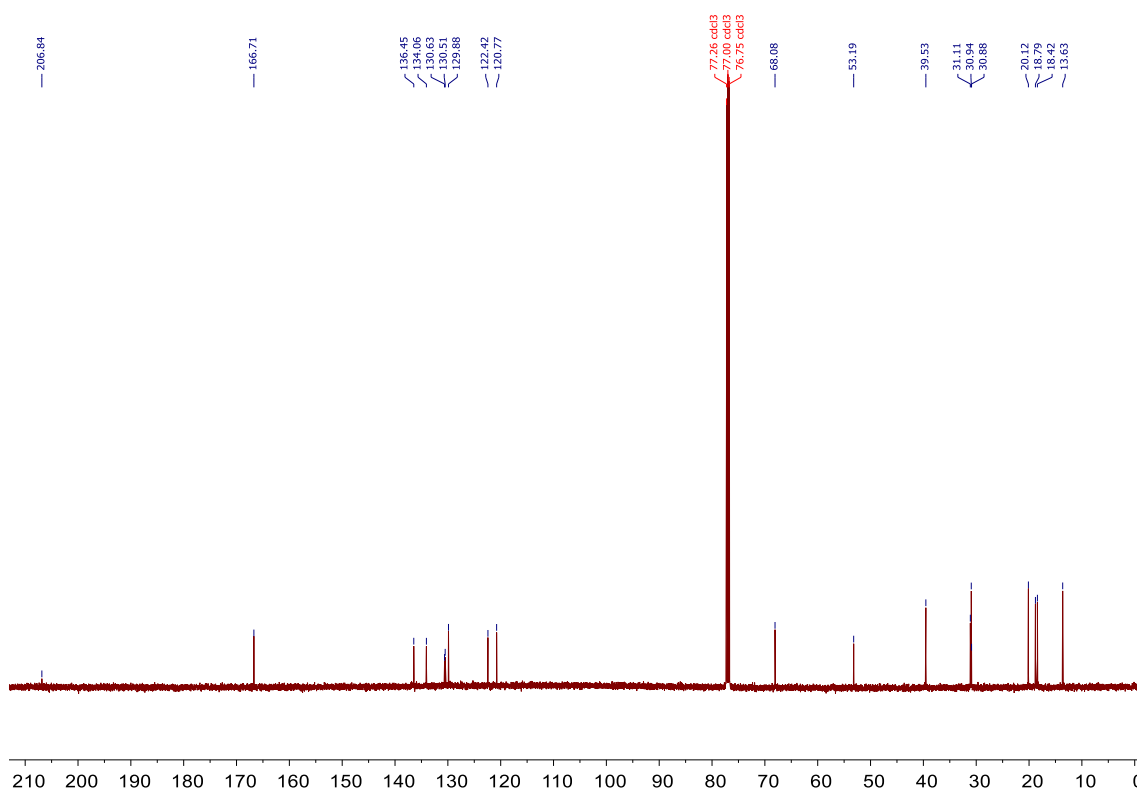

Fig. S34.  $^{13}\text{C}$  NMR (126 MHz) of **2c** in  $\text{CDCl}_3$ .



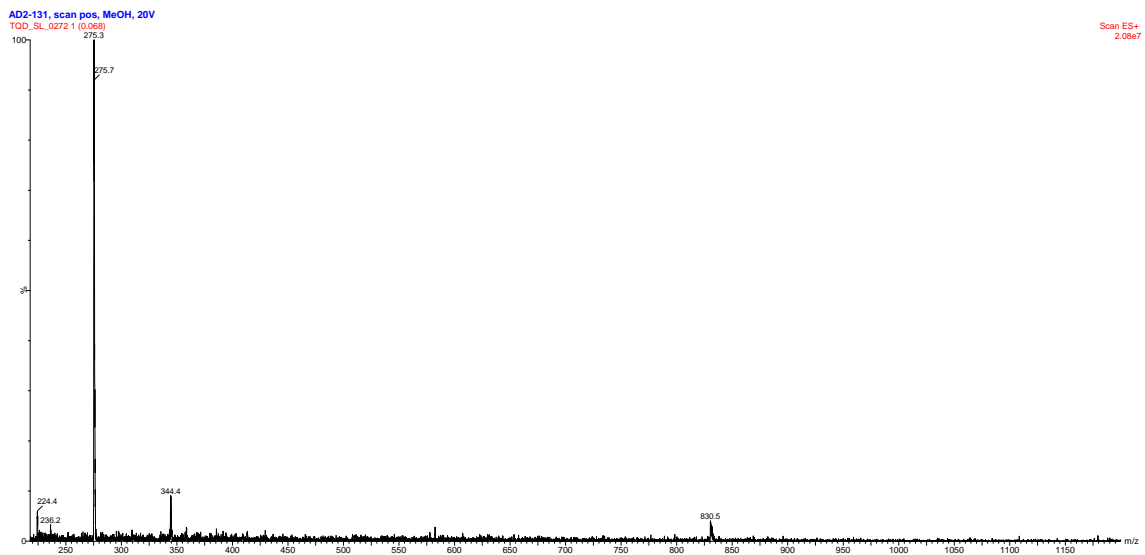

Fig. S35. MS (ESI) of 2c.
